# Supplementary material for: Regulatory effect of β-glucan secreted by Rhizobium pusense on triglyceride metabolism and their relationships with the modulation of intestinal microbiota in mice fed a high-fat diet
Source: Royal Society of Chemistry journal article supplement (doi:10.1039/d4fo01123f), 2024-01-01

**Table S1** The composition and energy supply ratio of the experimental diets

| Name                                    | Composition (g/kcal) |             |             |
|-----------------------------------------|----------------------|-------------|-------------|
|                                         | NFD                  | HFD         | GLU         |
| Casein                                  | 140/560              | 200/800     | 200/800     |
| L-cystine                               | 1.8/7.2              | 3/12        | 3/12        |
| Corn starch                             | 495.7/1983           | 0/0         | 0/0         |
| Maltodextrin                            | 125/500              | 125/500     | 125/500     |
| Sucrose                                 | 100/400              | 68.8/275    | 68.8/275    |
| Cellulose                               | 50/0                 | 50/0        | 50/0        |
| Soybean oil                             | 40/360               | 25/225      | 25/225      |
| Lard                                    | 0/0                  | 245/2205    | 245/2205    |
| t-Butylhydroquinone                     | 0.008/0              | 0/0         | 0/0         |
| Mineral mix                             | 35/0                 | 10/0        | 10/0        |
| Vitamin mix                             | 10/40                | 10/40       | 10/40       |
| Choline bitartrate                      | 2.6/0                | 2/0         | 2/0         |
| Dicalcium phosphate                     | 0/0                  | 13/0        | 13/0        |
| Calcium carbonate                       | 0/0                  | 5.5/0       | 5.5/0       |
| Potassium citrate, 1 H <sub>2</sub> O   | 0/0                  | 16.5/0      | 16.5/0      |
| -----<br>Energy supply ratio (g%/kcal%) |                      |             |             |
|                                         | NFD                  | HFD         | GLU         |
| Protein                                 | 14.2/14.7            | 23.25/18.14 | 23.25/18.14 |
| Carbohydrate                            | 73.71/75.9           | 34.55/60.65 | 34.55/60.65 |
| Fat                                     | 4/9.4                | 27.2/21.22  | 27.2/21.22  |

**Table S2** Primer sequence of the genes used in the present study

| Gene name | Primers | Sequence (5'–3')         |
|-----------|---------|--------------------------|
| AMPK      | Forward | acacctcagegctcctgttc     |
|           | Reverse | ctgtgctggaatcgacact      |
| ACC       | Forward | ccaacatgaggactataacttct  |
|           | Reverse | tacatacgtgccgtcaggcttcac |
| CPT1      | Forward | tcttcaactgagttccgatggg   |
|           | Reverse | acgccagagatgectttcc      |
| SREBP-1c  | Forward | gatgtgcgaactggacacag     |
|           | Reverse | catagggggcgtcaaacag      |
| FAS       | Forward | ccaacatgaggactataacttct  |
|           | Reverse | tacatacgtgccgtcaggcttcac |
| GAPDH     | Forward | agcttgtcatcaacgggaag     |
|           | Reverse | tttgatgtagtggggctctcg    |

**Fig. S1** Alpha diversity boxplot of mice (n=4): A. Chao index; B. Shannon index; C. Coverage index. Graph bars with different amounts of \* or # on top are considered significantly different (\*HFD group compared with the NFD group,  $*=p<0.05$ ,  $**=p<0.01$ ,  $***=p<0.001$ ; # HFD group compared with the GLU group,  $\#=p<0.05$ ,  $\##=p<0.01$ ,  $\###=p<0.001$ ) based on the Tukey–Kramer method.

**Fig. S2** Analysis of significantly differential lipid species in NFD, HFD, and GLU groups (n=6): A. PCA score plots of in liver sample of mice between the control, NFD, HFD and GLU group (Positive ion mode); B. PCA score plots of in liver sample of mice between the control, NFD, HFD and GLU group (Negative ion mode); C. PLS-DA score plots of in liver sample of mice between the control (HFD vs NFD); D. PLS-DA score plots of in liver sample of mice between the control (HFD vs GLU).

Fig. S1

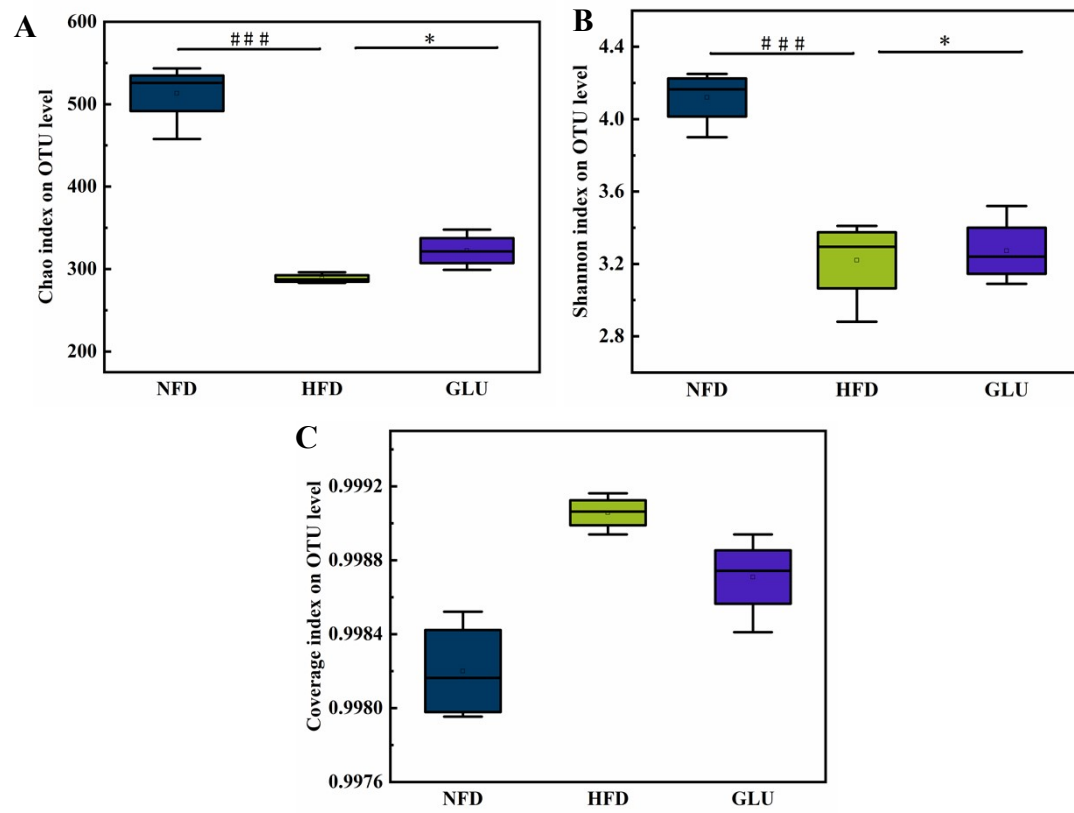

Fig. S2

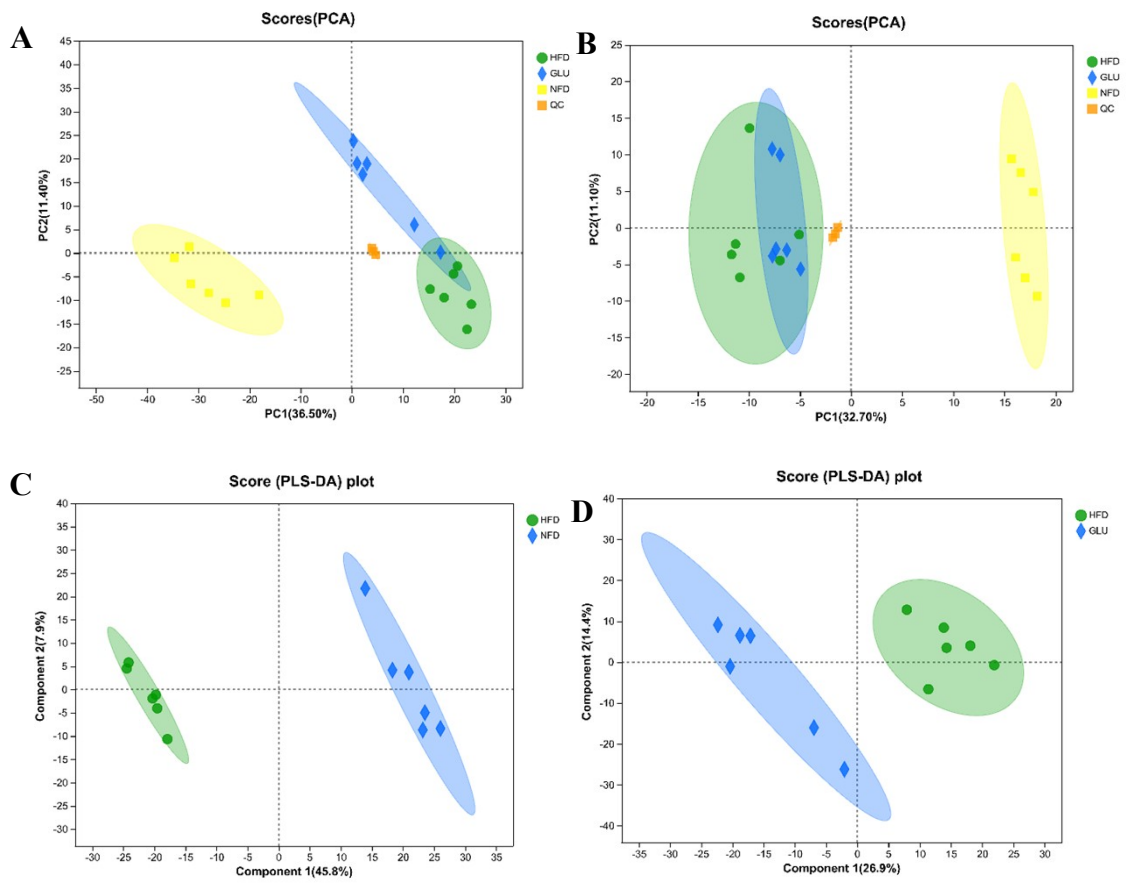

Supplement: d4fo01123f1.pdf [file d4fo01123f1.pdf]
